# Supplementary material for: Hypothalamic tanycytes generate acute hyperphagia through activation of the arcuate neuronal network
Source: PubMed Central journal article supplement (PMC7322081; doi:10.1073/pnas.1919887117), 2020-06-08
Supplement: pnas.1919887117.sd01.pdf [file pnas.1919887117.sd01.pdf]

## Dataset

Figure 3 data:

| No virus   | AdV-Control | AdV-CatCh  |
|------------|-------------|------------|
| 1.70994281 | 1.97404946  | 16.6442565 |
| 1.33795713 | -0.4702446  | 2.19441419 |
| -0.5699989 | 0.6244662   | 15.3361985 |
| 10.7904002 | 1.4291424   | 13.0240847 |
| -0.6486069 | 1.40439417  | 2.28323075 |
| -1.3755224 | 0.93570635  | 5.47188402 |
| -5.3194584 |             | 13.8543836 |
| 2.64352285 |             | 25.6259483 |
| 2.73617497 |             | 2.00919529 |
| 1.16275649 |             | 30.1867388 |
|            |             | 1.74057667 |
|            |             | 1.48863567 |
|            |             | 1.23839887 |
|            |             | 5.1822047  |
|            |             | 6.74465542 |
|            |             | 1.33695691 |
|            |             | 11.2065652 |
|            |             | 4.74395484 |
|            |             | 2.59225603 |
|            |             | 5.73992591 |
|            |             | 8.10166492 |
|            |             | 14.5794739 |
|            |             | 3.46892898 |
|            |             | 7.87000179 |
|            |             | 4.66634199 |
|            |             | 8.01419167 |
|            |             | 3.66648989 |
|            |             | 6.04559677 |
|            |             | 9.08059559 |
|            |             | 5.41164488 |

Figure 4C data:

| Control                                | Before | At peak | After | Difference with peak |
|----------------------------------------|--------|---------|-------|----------------------|
|                                        | -52    | -49     | -51   | 3                    |
|                                        | -51    | -49     | -50   | 2                    |
|                                        | -61    | -62     | -57   | -1                   |
|                                        | -65    | -64     | -61   | 1                    |
|                                        | -54    | -48     | -50   | 6                    |
|                                        | -50    | -48     | -48   | 2                    |
|                                        | -41    | -42     | -41   | -1                   |
|                                        | -42    | -43     | -40   | -1                   |
|                                        | -53    | -60     | -65   | -7                   |
|                                        | -68    | -69     | -61   | -1                   |
|                                        |        |         |       |                      |
| UC                                     |        |         |       |                      |
|                                        | -62    | -41     | -61   | 21                   |
|                                        | -55    | -43     | -54   | 12                   |
|                                        | -70    | -50     | -70   | 20                   |
|                                        | -61    | -44     | -61   | 17                   |
|                                        | -64    | -50     | -66   | 14                   |
|                                        | -54    | -44     | -56   | 10                   |
|                                        | -77    | -55     | -80   | 22                   |
|                                        | -40    | -30     | -43   | 10                   |
|                                        | -65    | -54     | -71   | 11                   |
|                                        | -48    | -41     | -45   | 7                    |
|                                        |        |         |       |                      |
| NPY                                    |        |         |       |                      |
|                                        | -53    | -37     | -44   | 16                   |
|                                        | -52    | -36     | -49   | 16                   |
|                                        | -50    | -29     | -52   | 21                   |
|                                        | -73    | -53     | -80   | 20                   |
|                                        | -75    | -47     | -80   | 28                   |
|                                        |        |         |       |                      |
| POMC                                   |        |         |       |                      |
|                                        | -48    | -34     | -44   | 14                   |
|                                        | -64    | -54     | -71   | 10                   |
|                                        | -56    | -40     | -52   | 16                   |
|                                        |        |         |       |                      |
| 100 nM MRS2500<br>and 30 $\mu$ M PPADS |        |         |       |                      |
|                                        | -63    | -66     | -67   | -3                   |
|                                        | -54    | -57     | -68   | -3                   |
|                                        | -79    | -77     | -82   | 2                    |
|                                        | -58    | -60     | -61   | -2                   |

|  |     |     |     |    |
|--|-----|-----|-----|----|
|  | -68 | -75 | -72 | -7 |
|  | -75 | -74 | -73 | 1  |
|  | -56 | -61 | -58 | -5 |
|  | -75 | -73 | -78 | 2  |
|  | -53 | -51 | -56 | 2  |

**Figure 4D data:**

| Time before firing | Pourcentage of Rhod Change before firing |
|--------------------|------------------------------------------|
| 141                | 7.8                                      |
| 191                | 6.7                                      |
| 145                | 23                                       |
| 190                | 10.8                                     |
| 160                | 4.1                                      |
| 160                | 9.2                                      |

Figure 5B data:

|             | 7 days | 11 days | 16 days | 21 days |
|-------------|--------|---------|---------|---------|
| AdV-Control |        |         |         |         |
| 18021       | 0.03   | 0.06    | 0.04    | 0.05    |
| 18022       | 0.03   | 0.03    | 0.01    | 0       |
| 18027       | 0.01   | 0.05    | 0       | 0.06    |
| 18028       | 0.02   | 0.01    | 0.09    | 0.03    |
| 18030       | 0.01   | 0       | 0       | 0       |
| 18032       | 0.01   | 0.04    | 0.04    | 0.08    |
| 18035       | 0.02   | 0.04    | 0.09    | 0.1     |
| 18036       | 0.01   | 0.01    | 0       | 0       |
| AdV-CatCh   |        |         |         |         |
| 18024       | 0.03   | 0.07    | 0.09    | 0.04    |
| 18025       | 0.02   | 0.05    | 0.11    | 0.06    |
| 18026       | 0      | 0.07    | 0.06    | 0.02    |
| 18029       | 0.02   | 0.05    | 0.1     | 0       |
| 18031       | 0.02   | 0.01    | 0       | 0.01    |
| 18033       | 0.02   | 0.02    | 0.07    | 0.07    |
| 18034       | 0.05   | 0.09    | 0.12    | 0       |

Figure 5C data:

| AdV-Control | AdV-CatCh |
|-------------|-----------|
| 0.43        | 0.18      |
| 0.55        | 0.04      |
| 0.27        | 0         |
| 0.49        | 0.44      |
| 0.05        | 0         |
| 0.31        | 0.19      |
| 0.55        | 0.38      |
|             | 0         |

Figure 5D data:

| AdV-Control | AdV-CatCh |
|-------------|-----------|
| 0           | 0.34      |
| 0.48        | 0.13      |
| 0.04        | 0.13      |
| 0.09        | 0.46      |

|      |      |
|------|------|
| 0.17 | 0.31 |
| 0.14 |      |
| 0.12 |      |
| 0.14 |      |

Figure 5E data:

| Minutes | AdV-Control |           |          |          |          |        |           |
|---------|-------------|-----------|----------|----------|----------|--------|-----------|
| 5       | 0           | 0         | 0        | 0        | 0        | 0      | 0         |
| 10      | 0           | 0         | 0        | 10200    | 0        | 0      | 0         |
| 15      | 0           | 0         | 0        | 0        | 3.047619 | 0      | 0         |
| 20      | 0           | 0         | 0        | 0        | 0        | 130200 | 16200     |
| 25      | 0           | 0         | 12000    | 0        | 5.054054 | 0      | 0         |
| 30      | 0           | 0         | 0        | 0        | 13200    | 0      | 0         |
| 35      | 171000      | 0.4642857 | 0        | 0        | 15.69444 | 76800  | 0         |
| 40      | 0           | 0         | 0        | 0        | 1.464789 | 0      | 0         |
|         |             |           |          |          |          |        |           |
| Minutes | AdV-CatCh   |           |          |          |          |        |           |
| 5       | 2400        | 0         | 18600    | 0        | 0        | 0      | 0         |
| 10      | 0           | 0         | 0        | 0        | 0        | 108000 | 0         |
| 15      | 0           | 6.759259  | 0        | 42600    | 0        | 0      | 40800     |
| 20      | 16200       | 0.3793103 | 0        | 41400    | 1800     | 65400  | 27000     |
| 25      | 21600       | 69600     | 16800    | 107400   | 0        | 0      | 0.5357143 |
| 30      | 73200       | 49200     | 14400    | 1.90625  | 0        | 104400 | 43800     |
| 35      | 0           | 177600    | 2.071429 | 14.04545 | 0        | 141000 | 27600     |
| 40      | 94200       | 0.1793103 | 0        | 0        | 0        | 0      | 48600     |

Figure S2 data:

| Time        | Distance | Speed       |
|-------------|----------|-------------|
| 61.10974545 | 65.835   | 1.077324075 |
| 52.37887273 | 11.172   | 0.213292105 |
| 13.57741818 | 41.7825  | 3.077352369 |
| 54.26425455 | 31.477   | 0.580068781 |
| 275.2169818 | 48.881   | 0.177608953 |
| 25.20109091 | 15.7275  | 0.624080126 |
| 27.16054545 | 26.53    | 0.976784507 |
| 157.1421455 | 46.188   | 0.293924968 |
| 115.4305818 | 59.927   | 0.519160512 |
| 85.36301818 | 42.8555  | 0.502038247 |
| 90.79861818 | 34.425   | 0.379135726 |
| 32.8768     | 33.781   | 1.027502677 |
| 45.40043636 | 69.8555  | 1.538652612 |
| 17.22461818 | 33.2615  | 1.931044256 |
| 156.5500727 | 53.527   | 0.341916162 |
| 31.31370909 | 59.445   | 1.898369811 |
| 111.1518909 | 84.0095  | 0.755808105 |
| 27.11734545 | 32.934   | 1.214499408 |
| 14.59370909 | 10.5555  | 0.723291107 |
| 99.12825455 | 54.554   | 0.550337543 |
| 80.3428     | 79.798   | 0.993219056 |
| 4.6928      | 37.618   | 8.016109785 |
| 50.09098182 | 49.659   | 0.991376056 |
| 15.23552727 | 48.8675  | 3.207470219 |
| 12.10461818 | 30.9915  | 2.560303806 |
| 23.48461818 | 12.866   | 0.547847953 |
| 53.22825455 | 38.8355  | 0.729603109 |
| 42.27007273 | 48.6885  | 1.151843299 |
| 125.2317091 | 56.802   | 0.45357522  |
| 15.65807273 | 46.0135  | 2.938643906 |
| 68.88352727 | 61.12    | 0.887294865 |
| 230.1253455 | 65.6475  | 0.285268447 |
| 38.79716364 | 35.756   | 0.921613764 |
| 73.71847273 | 48.6855  | 0.660424697 |
| 118.3439636 | 14.873   | 0.125676034 |
| 16.49014545 | 39.5805  | 2.400251721 |
| 103.7934182 | 62.775   | 0.604807136 |
| 18.42912727 | 27.8175  | 1.509431217 |
| 8.728763636 | 50.35    | 5.768285418 |

|             |         |             |
|-------------|---------|-------------|
| 24.24934545 | 49.855  | 2.055931781 |
| 36.86272727 | 26.854  | 0.728486522 |
| 204.6819273 | 18.5655 | 0.090704149 |
| 208.5620727 | 60.7865 | 0.291455197 |
| 30.06901818 | 65.425  | 2.175827611 |
| 129.8627273 | 76.276  | 0.587358679 |
| 56.21054545 | 65.145  | 1.158946235 |
| 21.31552727 | 50.553  | 2.371651395 |
| 12.52443636 | 24.535  | 1.958970391 |
| 7.828072727 | 76.807  | 9.811738173 |
| 173.7662545 | 66.486  | 0.382617443 |
| 64.18625455 | 69.656  | 1.085216773 |
| 70.44807273 | 28.24   | 0.400862634 |
| 75.13734545 | 69.362  | 0.923136153 |
| 4.694254545 | 41.244  | 8.786059554 |
| 82.96698182 | 41.112  | 0.495522425 |
| 101.7524364 | 56.776  | 0.557981725 |
| 109.5826182 | 23.668  | 0.215983159 |
| 101.7553455 | 57.836  | 0.568382916 |
| 175.3317091 | 76.699  | 0.43745082  |
| 62.61898182 | 52.434  | 0.837349929 |
| 64.18443636 | 59.309  | 0.924040209 |
| 32.87534545 | 80.24   | 2.440734809 |
| 6.262618182 | 58.215  | 9.295632962 |
| 12.52443636 | 36.044  | 2.877893979 |
| 40.70261818 | 56.147  | 1.379444432 |
| 51.6608     | 65.001  | 1.258226741 |
| 6.262618182 | 48.461  | 7.738137404 |
| 44.5828     | 56.015  | 1.256426245 |
| 3.873709091 | 22.689  | 5.857177054 |
| 3.873709091 | 42.149  | 10.88078609 |
| 3.131709091 | 55.262  | 17.64595574 |
| 76.70807273 | 79.423  | 1.03539298  |
| 70.44625455 | 26.166  | 0.371432096 |
| 6.262618182 | 43.179  | 6.894720187 |
| 76.70807273 | 41.4    | 0.539708515 |
| 79.83898182 | 51.004  | 0.638835802 |

**Figure S4 data:**

| AdV-Control | AdV-CatCh  |
|-------------|------------|
| 0.13043478  | 0.31531532 |
| 0.30567686  | 0.35555556 |
| 0.11764706  | 0.27906977 |
| 0.04237288  | 0.84745763 |



Figure S5A data:

|                    | 7 days | 11 days | 16 days | 21 days |
|--------------------|--------|---------|---------|---------|
| <b>AdV-Control</b> |        |         |         |         |
| 18088              | 0.612  | 0.707   | 0.504   | 0.319   |
| 18090              | 0.446  | 0.493   | 0.255   | 0.284   |
| 18092              | 0.222  | 0.734   | 0.358   | 0.162   |
| 18094              | 0.583  | 0.425   | 0.636   | 0.661   |
| 18096              | 0.153  | 0.597   | 0.923   | 0.825   |
| 18098              | 0.484  | 0.294   | 0.576   | 0.737   |
| 18100              | 0.486  | 0.415   | 0.653   | 0.69    |
| 18102              | 0.526  | 0.627   | 0.729   | 0.424   |
| <b>AdV-CatCh</b>   |        |         |         |         |
| 18089              | 0.966  | 0.547   | 0.211   | 0.394   |
| 18091              | 0.325  | 0.582   | 0.707   | 0.752   |
| 18093              | 0.98   | 0.617   | 0.761   | 0.588   |
| 18095              | 0.02   | 0.034   | 0.053   | 0.081   |
| 18097              | 0.026  | 1.079   | 0.031   | 0.051   |
| 18099              | 0.597  | 0.27    | 0.696   | 0.259   |
| 18101              | 0.363  | 0.936   | 0.709   | 0.489   |
| 18103              | 0.275  | 0.026   | 0.208   | 0.433   |

Figure S5B data:

| Fed        | 1 h Fasting |  | 1 h Fasting | Fed        |
|------------|-------------|--|-------------|------------|
| I          | II          |  | I           | II         |
| 0.2892562  | 0.829875519 |  | 0.39840637  | 0.25       |
| 0.47619048 | 0.560344828 |  | 0.34042553  | 0.08298755 |
| 0.24390244 | 0.24        |  | 0.49382716  | 0.11450382 |
| 0.28846154 | 0.598290598 |  | 0.97087379  | 0.16260163 |
| 0.25641026 | 0.140186916 |  | 1.2371134   | 0.1843318  |
| 0.18518519 | 1.00877193  |  | 1.05990783  | 0.77922078 |
| 0.17021277 | 0.366972477 |  | 0.42016807  | 0.17777778 |
| 0.12765957 | 0.3930131   |  | 0.41493776  | 0.16460905 |

Figure S6A data:

|       | Control |       |       |       |       |       |       |       |  | Catch |       |       |       |       |       |       |
|-------|---------|-------|-------|-------|-------|-------|-------|-------|--|-------|-------|-------|-------|-------|-------|-------|
|       | 18021   | 18022 | 18027 | 18028 | 18030 | 18032 | 18035 | 18036 |  | 18024 | 18026 | 18029 | 18033 | 18034 | 18025 | 18031 |
| Day1  | 18.1    | 19    | 20    | 17    |       |       | 20.1  | 18.4  |  | 18.4  | 17.8  |       | 19.8  | 19    | 17.1  |       |
| Day2  | 19.2    | 20.2  |       |       | 19.3  | 19.2  | 20    | 18.3  |  | 18.8  |       | 17.8  | 20    | 18.7  |       | 17.8  |
| Day3  |         |       | 20    | 18    | 19.9  | 19.4  | 19.9  | 18.7  |  |       | 18.8  | 18.1  | 19.9  | 19    | 17.7  | 17.9  |
| Day4  | 19.5    | 20    | 20.2  | 17.8  | 20    | 19    | 20.8  | 19    |  | 19.1  | 19    | 18.4  | 20.4  | 19.1  | 18.1  | 18.3  |
| Day5  | 20.4    | 20.3  | 20.5  | 18.1  | 20.2  | 19.2  | 20.9  | 18.9  |  | 19.2  | 19.1  | 19    | 20.4  | 19    | 18.3  | 18.3  |
| Day6  | 20.9    | 20.8  | 20.8  | 18.5  | 20.4  | 19.3  | 21.3  | 19.3  |  | 19.6  | 19.6  | 19.4  | 21.3  | 19.4  | 19    | 18.7  |
| Day7  | 18.8    | 19.1  | 19.9  | 18    | 19.3  | 17.6  | 20.2  | 18.4  |  | 18.5  | 17.7  | 17.5  | 18.5  | 18.8  | 18    | 17.5  |
| Day8  | 19.2    | 19.2  | 20    | 18.3  | 18.6  | 17.8  | 21    | 19.1  |  | 18.9  | 18.6  | 17.8  | 18    | 19.2  | 18.3  | 18.6  |
| Day9  | 19.9    | 20.7  | 20.5  | 18.4  | 19.1  | 18.7  | 21.5  | 19.2  |  | 20    | 19.2  | 18.6  | 18.4  | 19.7  | 18.4  | 18.7  |
| Day10 | 20.8    | 21    | 20.7  | 18.7  | 19.5  | 19.4  | 21.6  | 19.4  |  | 19.8  | 19.8  | 19.4  | 19.9  | 19.6  | 18.6  | 19    |
| Day11 | 21.3    | 21.5  | 21.2  | 18.6  | 20    | 19.3  | 22.1  | 19.5  |  | 20    | 20.2  | 19.4  | 20.6  | 20    | 18.8  | 19.3  |
| Day12 | 21.6    | 22.1  | 21.6  | 18.8  | 19.9  | 19.6  | 22.5  | 20.1  |  | 20.2  | 20.5  | 19.4  | 21.3  | 20.3  | 18.6  | 19.5  |
| Day13 | 21.9    | 22.1  |       |       |       |       |       |       |  | 20.2  | 20.7  |       |       |       | 18.9  |       |
| Day14 | 21.4    | 22.3  | 22.1  | 19.3  | 20.1  | 19.7  | 22.3  | 19.8  |  | 20    | 20.6  | 19.4  | 21.2  | 20.4  | 19    | 19.6  |
| Day15 | 21.7    | 22.8  | 22.3  | 19.7  | 20.2  | 19.8  | 22.4  | 20.3  |  | 20    | 20.8  | 19.5  | 21.8  | 20.7  | 19.5  | 19.3  |
| Day16 | 21.7    | 22.4  | 22.4  | 19.8  | 20    | 19.8  | 22.6  | 20.2  |  | 20.4  | 20.8  | 19.6  | 22    | 20.9  | 19.4  | 19.7  |
| Day17 | 21.6    | 22.3  |       |       |       |       |       |       |  | 20.3  | 20.8  |       |       |       | 19.6  |       |
| Day18 | 21.3    | 22.4  | 22.4  | 19.9  | 19.7  | 19.4  | 22.6  | 20    |  | 20.2  | 21.2  | 19.3  | 21.5  | 20.8  | 19.5  | 19.1  |
| Day19 | 21.9    | 22.7  | 22.4  | 19.4  |       |       | 21.2  | 19.2  |  | 20.5  | 21.2  |       | 19.9  | 19.9  | 19.5  |       |
| Day20 | 21.7    | 22    | 22.6  | 19.9  | 19.8  | 18.2  | 23.1  | 20.9  |  | 20.3  | 21.6  | 18.2  | 21.3  | 21.4  | 19.7  | 18.3  |
| Day21 | 22.2    | 22.6  | 21.2  | 18.5  | 20.2  | 20    | 23    | 20.9  |  | 20.6  | 20.5  | 19.9  | 21.8  | 21.6  | 18.5  | 19.5  |
| Day22 | 22.2    | 22.5  |       |       |       |       |       |       |  | 20.9  | 22    |       |       |       | 19.8  |       |

|       |      |      |      |      |      |      |      |      |  |      |      |      |      |      |      |      |
|-------|------|------|------|------|------|------|------|------|--|------|------|------|------|------|------|------|
| Day23 | 20.9 | 22.4 | 22.8 | 20.4 | 20   | 20   |      |      |  | 20.9 | 21.7 | 20.3 |      |      | 19.9 | 19.7 |
| Day24 | 21   | 22.4 | 23.2 | 20.8 |      |      | 23.5 | 20.7 |  | 20.7 | 22   |      | 22.6 | 22   | 20.1 |      |
| Day25 | 21.2 | 22.3 |      |      | 20.3 | 20.8 | 23.7 | 20.8 |  | 20.7 |      | 20.6 | 22.3 | 22.2 |      | 20   |
| Day26 |      |      | 23.4 | 20.7 | 20.7 | 20.7 | 23.6 | 21   |  |      | 21.8 | 20.9 | 22.7 | 22.1 | 20.3 | 20.3 |
| Day27 | 22.4 | 22.5 |      |      |      |      |      |      |  | 21.3 | 22.4 |      |      |      |      |      |
| Day28 | 22.9 | 22.5 | 24   | 20.7 | 20.7 | 20.8 |      |      |  | 21.1 | 22.4 | 20.9 |      |      |      | 20.3 |
| Day29 | 23.9 | 23.1 | 23.6 | 21   |      |      |      |      |  | 20.9 | 22.4 |      |      |      |      |      |
| Day30 | 23.7 | 23.4 |      |      |      |      |      |      |  | 21.1 |      |      |      |      |      |      |
| Day31 |      |      |      |      |      |      | 25   | 21.5 |  |      |      |      | 23.2 | 22.7 |      |      |
| Day32 |      |      |      |      | 21.2 | 21.4 | 25.1 | 21.3 |  |      |      | 21.5 | 23.1 | 22.3 |      | 20.8 |
| Day33 |      |      | 24.3 | 21.2 | 21.6 | 21.5 | 25   | 21.7 |  |      | 22.7 | 21.9 | 23.6 | 22.5 |      | 20.7 |
| Day34 | 24.5 | 23.7 | 24.6 | 21.2 | 21.3 | 21.6 | 25.1 | 21.6 |  | 22.4 | 22.6 | 22.1 | 24   | 22.6 |      | 18.8 |
| Day35 | 24.1 | 23.3 |      |      |      |      |      |      |  | 22.6 |      |      |      |      |      |      |
| Day36 | 24.6 | 23.1 | 25.4 | 21.7 | 21.4 | 21.3 |      |      |  | 22.5 | 23   | 22.3 |      |      |      |      |
| Day37 | 25.2 | 23.3 | 25   | 21.4 |      |      | 25.4 | 22   |  | 22.7 | 22.6 |      | 24.3 | 22.7 |      |      |
| Day38 | 25.2 | 24.1 |      |      | 22.9 | 21.4 | 25.2 | 22.3 |  | 22.8 |      | 22.6 | 24.2 | 22.9 |      |      |
| Day39 |      |      | 25   | 21.8 | 22.9 | 21.7 | 25.6 | 22   |  |      | 22.6 | 22.8 | 24.2 | 22.8 |      |      |
| Day40 | 25.8 | 24.8 | 25.8 | 21.9 | 23.3 | 21.8 | 26   | 22   |  | 23.4 | 22.7 | 23   | 24   | 22.8 |      |      |
| Day41 | 25.4 | 24.9 | 24.8 | 22.3 | 23   | 21.9 | 25.7 | 22.4 |  | 23.5 | 22.8 | 22.6 | 24.3 | 23.4 |      |      |
| Day42 | 25.4 | 25   | 25   | 22.1 | 24.1 | 22.5 |      |      |  | 23.8 | 22.8 | 22.9 |      |      |      |      |
| Day43 | 25.9 | 25.3 | 25.6 | 22.3 |      |      |      |      |  | 24.2 | 22.8 |      |      |      |      |      |
| Day44 | 25.8 | 25.4 |      |      |      |      | 25.7 | 22.4 |  | 24.1 |      |      | 24.4 | 23.6 |      |      |
| Day45 |      |      |      |      | 24.3 | 22.2 | 25.1 | 22.5 |  |      |      | 23.5 | 24.8 | 23.6 |      |      |
| Day46 |      |      | 25.9 | 22.4 | 24.8 | 22.4 | 25.6 | 22.3 |  |      | 23.7 |      | 24.7 | 23.7 |      |      |
| Day47 |      |      |      |      |      |      |      |      |  |      |      | 23.7 |      |      |      |      |
| Day48 | 26.6 | 25.9 | 26.4 | 22.3 | 24.7 | 22.9 | 26.1 | 22.6 |  | 24.3 | 23.6 | 24.1 | 24.1 | 23.5 |      |      |

|       |      |      |      |      |      |      |  |  |  |      |      |      |  |  |  |  |
|-------|------|------|------|------|------|------|--|--|--|------|------|------|--|--|--|--|
| Day49 | 26.6 | 25.9 | 26.2 | 22.6 | 25.4 | 22.7 |  |  |  | 24.7 | 23.4 | 23.8 |  |  |  |  |
| Day50 | 26.7 | 26.5 | 26.4 | 22.5 |      |      |  |  |  | 24.4 | 23.6 |      |  |  |  |  |
| Day51 | 26.6 |      |      |      |      |      |  |  |  | 24.8 |      |      |  |  |  |  |

**Figure S6B data:**

|       | Control |       |       |       |       |       |       |       |  | Catch |       |       |       |       |       |       |
|-------|---------|-------|-------|-------|-------|-------|-------|-------|--|-------|-------|-------|-------|-------|-------|-------|
|       | 18021   | 18022 | 18027 | 18028 | 18030 | 18032 | 18035 | 18036 |  | 18024 | 18026 | 18029 | 18033 | 18034 | 18025 | 18031 |
| Day1  | 5.3     | 5.1   |       |       |       |       | 3.7   | 1.9   |  | 4.9   | 4.65  |       | 3.2   | 3.5   |       |       |
| Day2  | 5.65    | 4.75  |       |       | 3.4   | 3.4   | 4.2   | 2.7   |  | 3.95  | 4.65  | 2.9   | 3.7   | 3.9   |       | 3.3   |
| Day3  | 5.65    | 4.75  | 5.8   | 3.6   | 5.5   | 3.1   | 4.4   | 5     |  | 3.95  | 3.5   | 4.2   | 3.8   | 4.1   | 3     | 3.6   |
| Day4  | 2.3     | 4.3   | 6.3   | 4.4   | 4.8   | 3.5   | 3.8   | 1.3   |  | 4.1   | 3.2   | 4.5   | 3.7   | 3.5   | 4.4   | 3.8   |
| Day5  | 3.1     | 3.9   | 2.3   | 4.9   | 2.6   | 2.2   | 2.6   | 3.4   |  | 3     | 2.1   | 1.4   | 2.6   | 2.1   | 3.5   | 2.5   |
| Day6  | 3.25    | 5.3   | 8.4   | 3.4   | 4     | 3.7   | 2.9   | 6.6   |  | 2.4   | 2.1   | 2.5   | 4.5   | 3.7   | 3.4   | 3.9   |
| Day7  | 3.25    | 4.9   | 7.9   | 3.5   | 5.8   | 4.6   | 5.7   | 3.6   |  | 5     | 2.7   | 3.3   | 1.8   | 4.4   | 5.3   | 4.1   |
| Day8  | 4.8     | 7.2   | 0.5   | 4.5   | 5.1   | 5     | 4.6   |       |  | 4.8   | 6.2   | 6.1   | 1.2   | 5.2   | 4.8   | 3     |
| Day9  | 9.4     | 7.3   | 3.8   | 4.2   | 5.4   | 0.8   | 4     | 3.4   |  | 5.2   | 3.8   | 4.5   | 6.9   | 4     | 3.5   | 6.1   |
| Day10 | 6.6     | 7.5   | 3.5   | 3.6   | 4.2   | 5.1   |       | 6.6   |  | 4.3   | 2.9   | 3.9   |       |       | 4.3   | 4     |
| Day11 | 4.8     | 6.5   | 7.1   | 4.9   |       |       | 4     |       |  | 5.4   | 3.9   |       | 6     | 3.3   | 3.9   | 33.9  |
| Day12 | 3.5     | 6.2   |       |       |       |       |       |       |  | 1.4   |       |       |       |       |       |       |
| Day13 | 3.6     | 4.2   |       |       |       |       |       | 4.6   |  | 2.4   |       |       |       |       |       |       |
| Day14 | 3.6     | 9.3   | 5.1   | 5     | 4.2   | 3.1   | 0     | 1.2   |  | 4     | 4.1   | 4.7   | 0     | 0     | 6.2   | 5     |
| Day15 | 2.7     | 2.3   | 4.3   | 4.1   | 0     | 0     | 2.7   |       |  | 5.7   | 3.7   | 4.6   | 6     | 3.6   | 4.7   | 0     |
| Day16 | 4.2     | 6.1   | 0     | 0     |       |       |       |       |  | 1.9   | 0     |       |       |       |       |       |
| Day17 | 4.6     | 6.9   |       |       |       |       |       | 7.1   |  | 5.8   |       |       |       |       |       |       |
| Day18 | 5.2     | 1.2   | 5.8   | 3.2   |       |       | 7.4   | 2.3   |  |       | 1.4   |       | 4.1   | 6     | 13.8  |       |

|       |     |      |     |     |     |     |     |     |  |     |      |     |     |     |     |     |
|-------|-----|------|-----|-----|-----|-----|-----|-----|--|-----|------|-----|-----|-----|-----|-----|
| Day19 | 5.8 |      | 9.4 | 5.9 |     |     | 3.1 | 4   |  | 2.7 | 9.1  |     | 5.6 | 4   | 5.4 |     |
| Day20 | 5.9 | 8.7  | 6   | 7.2 | 5.3 | 4.7 | 3.7 |     |  | 5.6 | 4.7  | 4   | 2.1 | 4.2 | 6   | 6.2 |
| Day21 | 3.4 | 7.8  |     |     |     |     |     |     |  | 1.7 |      |     |     |     |     |     |
| Day22 | 3.7 | 4.6  |     |     |     |     |     |     |  | 5   |      |     |     |     |     |     |
| Day23 | 3.4 | 5.2  | 4.8 | 4.2 |     |     |     | 4.5 |  | 4.3 | 5.1  |     |     |     | 3.7 |     |
| Day24 | 4.2 | 5.7  |     |     |     |     | 3.6 |     |  | 3.5 | 4.85 |     | 5.7 | 3.7 |     |     |
| Day25 | 5.7 | 7.05 |     |     | 6.1 | 3.4 | 5.9 |     |  | 4.8 | 4.85 | 5   | 4.3 | 4.2 |     | 5   |
| Day26 | 5.7 | 7.05 |     |     |     |     |     |     |  | 4.8 |      |     |     |     |     |     |
| Day27 | 5.4 | 5.1  |     |     |     |     |     |     |  | 3.1 |      |     |     |     |     |     |
| Day28 | 6.9 | 7.9  | 5.2 | 5.1 |     |     |     |     |  | 4.2 | 4.5  |     |     |     |     |     |
| Day29 | 6   | 8.4  |     |     |     |     |     |     |  | 5.9 | 5.1  |     |     |     |     |     |
| Day30 | 7.3 | 8.4  |     |     |     |     |     |     |  | 5.1 | 5.1  |     |     |     |     |     |
| Day31 | 7.3 | 8.4  |     |     |     |     |     |     |  | 5.1 | 5.1  |     |     |     |     |     |
| Day32 | 7.3 | 8.4  |     |     |     |     | 4.1 | 4   |  | 5.1 | 5.1  |     | 7   | 4.2 |     |     |
| Day33 | 3.3 | 8.4  |     |     | 2.7 | 4.5 | 3.5 |     |  | 5.1 | 4.2  | 4.4 | 2.6 | 3.8 |     | 0.4 |
| Day34 |     | 5.8  |     |     |     |     |     |     |  | 3.7 |      |     |     |     |     |     |
| Day35 |     | 4.3  |     |     |     |     |     |     |  | 6.8 |      |     |     |     |     |     |
| Day36 | 2.8 | 4.4  | 4.3 | 5.6 |     |     |     | 4.8 |  | 3.3 |      |     |     |     |     |     |
| Day37 | 5.8 | 7.2  |     |     |     |     | 4.4 | 4.3 |  | 3.4 |      |     | 5   | 4.1 |     |     |
| Day38 |     |      |     |     | 4.4 | 4.6 | 5.4 | 5.6 |  |     |      | 5.4 | 5.5 | 4.6 |     |     |
| Day39 |     |      | 4.4 | 4.6 | 4.5 | 6.1 | 5.9 | 4.1 |  |     | 3.8  | 5.5 | 5.6 | 5.7 |     |     |
| Day40 | 4   | 6.4  | 3.6 | 6.5 | 5.4 | 4.2 | 4.5 |     |  | 5.2 | 4.2  | 2.9 | 2.8 | 4.1 |     |     |
| Day41 | 4.4 | 7.3  | 5.9 | 5.1 | 4.2 | 4   |     |     |  | 4.6 | 5.1  | 2.4 |     |     |     |     |
| Day42 | 4.1 | 4.2  | 5.7 | 5.1 |     |     |     |     |  | 3.7 | 4.2  |     |     |     |     |     |
| Day43 | 4.3 | 5.6  |     |     |     |     |     | 4.9 |  | 4   |      |     |     |     |     |     |
| Day44 |     |      |     |     |     |     | 3.9 | 4.3 |  |     |      |     | 5   | 4.6 |     |     |

|       |     |     |     |     |     |     |     |  |  |     |     |     |     |     |  |  |
|-------|-----|-----|-----|-----|-----|-----|-----|--|--|-----|-----|-----|-----|-----|--|--|
| Day45 |     |     |     |     | 5.8 | 4.8 | 4.3 |  |  |     |     |     | 4.6 | 4.2 |  |  |
| Day46 |     |     |     |     |     |     |     |  |  |     |     |     |     |     |  |  |
| Day47 |     |     |     |     |     |     |     |  |  |     |     | 4.6 |     |     |  |  |
| Day48 | 5.6 | 5.5 | 3.9 | 4.7 | 5   | 4.8 |     |  |  | 4.9 | 3.9 | 4.2 |     |     |  |  |
| Day49 | 5.2 | 6.4 | 5.2 | 4.1 |     |     |     |  |  | 3.2 | 4.2 |     |     |     |  |  |
| Day50 | 4.9 | 6.7 |     |     |     |     |     |  |  | 4   |     |     |     |     |  |  |

**Figure S6C data:**

| Control | Catch |
|---------|-------|
| 12      | 0.3   |
| 45      | 1.24  |
| 7.1     | 10.25 |
| 6.13    | 10.17 |
|         | 7     |
|         | 15.5  |

**Figure S6D data:**

| Control | Catch |
|---------|-------|
| 0.3     | 0.3   |
| 0.4     | 0.3   |
| 0.1     | 0.3   |
| 0.4     | 0.1   |
| 0.3     | 0.2   |
| 0.4     | 0.3   |
| 0.4     | 0.4   |
| 0.2     |       |

**Figure S6E data:**

| Control | Catch |
|---------|-------|
| 0       | -0.3  |
| -0.7    | 0.02  |
| -0.3    | -0.3  |
| -0.1    | -0.6  |
| -0.1    | 0.7   |
| 0.2     | 0.1   |

**Figure S6F data:**

| Control | Catch |
|---------|-------|
| 0.3     | 0.1   |
| 0       | 0.6   |
| -0.3    | -0.4  |
| -0.2    | 1.7   |
| 0.1     | 1.1   |
| 1.7     | 0.7   |
| 0       | 0.4   |
| 0.3     |       |

**Figure S6G data:**

| Control    | Catch      |
|------------|------------|
| 20.3703704 | 22.6600985 |
| 15.2466368 | 15.8163265 |
| 21.6080402 | 14.5728643 |

|            |            |
|------------|------------|
| 23.6180905 | 9.27835052 |
| 24.137931  | 33.7837838 |
|            | 17.9245283 |

**Figure S6H data:**

| Control    | Catch      |
|------------|------------|
| 21.2962963 | 28.5714286 |
| 18.8340807 | 13.2653061 |
| 27.1493213 | 28.8461538 |
| 25.8883249 | 23.1155779 |
| 25.1256281 | 28.8659794 |
| 25.6281407 | 18.9189189 |
| 25.6157635 | 19.8113208 |
